# Supplementary material for: Variations of Phosphorous Accessibility Causing Changes in Microbiome Functions in the Gastrointestinal Tract of Chickens
Source: PubMed Central journal article supplement (PMC5070839; doi:10.1371/journal.pone.0164735), 2016-10-19
Supplement: pone.0164735.s001.pdf [file pone.0164735.s001.pdf]

UNIVERSITÄT HOHENHEIM

TIERSCHUTZBEAUFTRAGTER

Prof. Dr. W. M. Amselgruber

Universität Hohenheim, D-70593 Stuttgart  
Telefon: 0711 / 459 – 22410

|                                                  |
|--------------------------------------------------|
| <b>Universität Hohenheim</b><br><b>Inst. 450</b> |
| Eing.: 11. Okt. 2012                             |
| Erl.: _____ <i>bo</i>                            |

Herrn  
Prof. Rodehutschord  
Inst. für Tierernährung -450a-

*Alen ✓*  
*Dr. W. F. J. ✓*  
*Ingham ✓*

10.10.2012

### Interne Versuchsanzeige

Sehr geehrter Herr Prof. Rodehutschord,

Der von Ihnen eingebrachte intern anzeigepflichtige Versuch „*Untersuchungen wie sich die Zulage von anorganischem Phosphat, allein oder in Kombination mit Phytase, auf die Entstehung von Inositolphosphaten und die Zusammensetzung der Mikrobiota im Verdauungstrakt von Broilern auswirkt*“ wird intern unter der Nummer **S 363/12 TE** geführt.

Mit Erhalt dieses Schreibens kann der Versuch begonnen werden.

Bitte verwenden sie dieses Aktenzeichen bei allen diesen Versuch betreffenden Korrespondenzen:

Bitte reichen sie die unterschriebenen Formulare (Erklärung, Stellungnahme Ausschussvorsitzender) nach

Die beiliegende Anzeige der Tötung von Wirbeltieren zu wissenschaftlichen Zwecken wird von der Zentralen Versuchstierdokumentation unter der Versuchsnummer: **T98/12 TE** erfasst.

Bitte melden Sie der Zentralen Versuchstierdokumentation über das Tiermeldeformular unter Angabe der Versuchsnummer die jeweils verbrauchten Tiere.

Mit freundlichen Grüßen

i.A. Karen Müller
