# Supplementary material for: Variations of Phosphorous Accessibility Causing Changes in Microbiome Functions in the Gastrointestinal Tract of Chickens
Source: PLoS One. 2016 Oct 19;11(10):e0164735. doi: 10.1371/journal.pone.0164735 (PMC5070839; doi:10.1371/journal.pone.0164735)
Supplement: S6 Table — Table below list the phylogenetic marker proteins which this work refer to for the phylogenetic assessment of the microbial community in the different dietary treatments in the ceca samples. (XLSX) [file pone.0164735.s008.xlsx]

## Sheet: S6 Table
Diet treatment	BD - 0		BD - 500		BD - 12500		BD + 0		BD + 500		BD + 12500
Biological duplicates	A	B	A	B	A	B	A	B	A	B	A	B
Gene name of marker proteins
Recombinant A (recA)		Ruminococcaceae	Lachnospiraceae	Lachnospiraceae	Clostridiaceae	Enterobacteriaceae	Lachnospiraceae	Enterobacteriaceae		Clostridiaceae	Lachnospiraceae	Clostridiaceae
					Firmicutes	Clostridiaceae		Clostridiaceae
DNA repair and recombination protein (RadA)		Bacteroidaceae				Bacteroidaceae	Bacteroidaceae
heat shock protein 70 (HSP70)	Rikenellaceae	Rikenellaceae		Rhizobiaceae	Rikenellaceae	Rikenellaceae		Shewanellaceae	Rikenellaceae			Rikenellaceae
	Lachnospiraceae							Rikenellaceae
								Bacillaceae
elongation factor Tu (EF Tu)	Clostridiaceae	Ruminococcaceae	Clostridiaceae	Clostridiaceae	Clostridiaceae	Lachnospiraceae	Lachnospiraceae	Lachnospiraceae	Lachnospiraceae	Lachnospiraceae	Lachnospiraceae	Lachnospiraceae
	Lachnospiraceae	Clostridiales	Lachnospiraceae	Lachnospiraceae	Lachnospiraceae	Ruminococcaceae	Ruminococcaceae	Ruminococcaceae	Ruminococcaceae	Coriobacteriaceae	Lactobacillaceae	Ruminococcaceae
	Coriobacteriaceae	Clostridiaceae	Ruminococcaceae	Ruminococcaceae	Eubacteriaceae	Clostridiales	Lactobacillaceae	Clostridiaceae	Clostridiaceae	Erysipelotrichaceae	Coriobacteriaceae	Thermoanaerobacteraceae
	Bacillaceae	Firmicutes	Firmicutes	Lactobacillaceae	Ruminococcaceae	Eubacteriaceae	Clostridiaceae	Lactobacillaceae	Firmicutes	Clostridiaceae	Ruminococcaceae	Mycoplasmataceae
	Lactobacillaceae	Coriobacteriaceae	Coriobacteriaceae	Coriobacteriaceae	Lactobacillaceae	Lactobacillaceae	Firmicutes	Bacillaceae	Lactobacillaceae	Acidaminococcaceae	Clostridiaceae	Eubacteriaceae
	Firmicutes	Lachnospiraceae	Sporolactobacillaceae	Bacillaceae	Coriobacteriaceae	Listeriaceae	Coriobacteriaceae	Coriobacteriaceae	Coriobacteriaceae	Ruminococcaceae	Sporolactobacillaceae	Lactobacillaceae
	Acidaminococcaceae		Rickettsiaceae	Clostridiales	Firmicutes	Coriobacteriaceae	Sporolactobacillaceae	Mycoplasmataceae	Clostridiales	Firmicutes	Clostridiales
			Erysipelotrichaceae	Acidaminococcaceae	Clostridiales	Mycoplasmataceae	Alicyclobacillaceae	Desulfurobacteriaceae	Erysipelotrichaceae	Lactobacillaceae	Acidaminococcaceae
			Enterobacteriaceae	Peptostreptococcaceae	Carnobacteriaceae	Firmicutes	Carnobacteriaceae	Bacteroidaceae	Sporolactobacillaceae		Firmicutes
			Enterococcaceae	Carnobacteriaceae	Erysipelotrichaceae	Clostridiaceae	Eubacteriaceae	Firmicutes	Acidaminococcaceae		Thermoanaerobacteraceae
				Firmicutes	Synergistaceae	Carnobacteriaceae	Desulfurobacteriaceae	Synergistaceae	Bacteroidaceae		Alcaligenaceae
				Thermoanaerobacteraceae	Thermoanaerobacteraceae	Thermoanaerobacteraceae	Burkholderiaceae		Carnobacteriaceae		Carnobacteriaceae
				Thermoactinomycetaceae	Streptococcaceae	Erysipelotrichaceae			Bacillaceae		Erysipelotrichaceae
				Desulfurobacteriaceae	Desulfurobacteriaceae	Desulfurobacteriaceae			Burkholderiaceae
				Burkholderiaceae	Bacillaceae				Desulfurobacteriaceae
				Enterococcaceae					Synergistaceae
elongation factor G (EF-G)	Ruminococcaceae	Ruminococcaceae	Ruminococcaceae	Ruminococcaceae	Clostridiaceae	Ruminococcaceae	Ruminococcaceae	Bacteroidaceae	Ruminococcaceae	Ruminococcaceae	Clostridiaceae
	Lachnospiraceae	Lactobacillaceae	Lachnospiraceae	Lachnospiraceae	Lachnospiraceae	Clostridiaceae	Lactobacillaceae	Lactobacillaceae	Lachnospiraceae		Clostridiales
		Lachnospiraceae		Clostridiaceae	Ruminococcaceae	Clostridiales	Bacteroidaceae	Clostridiaceae	Clostridiaceae		Ruminococcaceae
		Clostridiaceae			Lactobacillaceae	Bacteroidaceae	Clostridiaceae	Lachnospiraceae	Bacteroidaceae
							Lachnospiraceae	Natranaerobiaceae
							Peptoniphilaceae
RNA polymerase B (RpoB)	Paenibacillaceae	Lactobacillaceae	Peptostreptococcaceae	Clostridiaceae	Ruminococcaceae	Clostridiaceae	Peptostreptococcaceae	Peptostreptococcaceae	Ruminococcaceae	Peptostreptococcaceae	Lachnospiraceae	Ruminococcaceae
	Bacteroidaceae	Peptostreptococcaceae	Ruminococcaceae	Lachnospiraceae	Lachnospiraceae	Ruminococcaceae	Lachnospiraceae	Lachnospiraceae	Peptostreptococcaceae		Peptostreptococcaceae	Lachnospiraceae
	Peptostreptococcaceae			unclassified Acidobacteria	Peptostreptococcaceae	Bacteroidaceae	Lactobacillaceae		Bacteroidaceae
					unclassified Acidobacteria	Lachnospiraceae	Bacteroidaceae		Lachnospiraceae
					Rikenellaceae	Rikenellaceae
						unclassified Acidobacteria
Ribosomal proteins	Lachnospiraceae	Lactobacillaceae	Eubacteriaceae	Ruminococcaceae	Ruminococcaceae	Lachnospiraceae	Lachnospiraceae	Lachnospiraceae	Lachnospiraceae	Ruminococcaceae	Ruminococcaceae	Ruminococcaceae
	Ruminococcaceae	Lachnospiraceae	Ruminococcaceae	Lachnospiraceae	Lachnospiraceae	Ruminococcaceae	Lactobacillaceae	Lactobacillaceae	Ruminococcaceae	Lachnospiraceae	Lachnospiraceae	Clostridiaceae
	Clostridiaceae	Ruminococcaceae	Lachnospiraceae	Clostridiales	Clostridiaceae	Clostridiaceae	Ruminococcaceae	Clostridiaceae	Clostridiaceae	Clostridiales	Clostridiaceae	Eubacteriaceae
	Clostridiales	Clostridiales	Firmicutes	Clostridiaceae	Clostridiales	Clostridiales	Clostridiaceae	Bacteroidaceae	Eubacteriaceae	Clostridiaceae	Clostridiales	Lachnospiraceae
	Lactobacillaceae	Clostridiaceae	Enterobacteriaceae	Lactobacillaceae	Eubacteriaceae	Bacteroidaceae	Clostridiales	Clostridiales	Bacteroidaceae	Eubacteriaceae	Bacteroidaceae	Bacteroidaceae
	Eubacteriaceae	Firmicutes	Clostridiales	Eubacteriaceae	Lactobacillaceae	Eubacteriaceae	Bacteroidaceae	Eubacteriaceae	Clostridiales	Firmicutes	Eubacteriaceae	Clostridiales
	Firmicutes	Bacteroidaceae	Staphylococcaceae	Firmicutes	Erysipelotrichaceae	Firmicutes	Firmicutes	Ruminococcaceae	Firmicutes	Mycoplasmataceae	Firmicutes	Firmicutes
	Bacteroidaceae	Sporolactobacillaceae	Mycoplasmataceae	Bacteroidaceae	Firmicutes	Lactobacillaceae	Chroococcales	Flavobacteriaceae	Lactobacillaceae	Oscillospiraceae	Lactobacillaceae	Lactobacillaceae
	Peptostreptococcaceae	Rikenellaceae	Clostridiaceae	Oscillospiraceae	Oscillospiraceae	Oscillospiraceae	Rikenellaceae	Oscillatoriophycideae	Veillonellaceae	Oscillatoriophycideae	Mycoplasmataceae	Mycoplasmataceae
	Enterobacteriaceae	Peptostreptococcaceae	Bifidobacteriaceae	Oscillatoriophycideae	Mycoplasmataceae	Mycoplasmataceae	Clostridiales Family XI. Incertae Sedis	Firmicutes	unclassified Acidobacteria	Thermoanaerobacteraceae	Oscillospiraceae	Halanaerobiaceae
	Planococcaceae	Oscillatoriophycideae	Alcanivoracaceae	Mycoplasmataceae	Fusobacteriaceae	Rikenellaceae	Sporolactobacillaceae	Acetobacteraceae	Thermoanaerobacteraceae		Desulfohalobiaceae	Peptostreptococcaceae
	Listeriaceae	Enterobacteriaceae	Lactobacillaceae	Rhizobiaceae	Chroococcales	Fusobacteriaceae	Oceanospirillaceae	Enterobacteriaceae	Rikenellaceae		Enterobacteriaceae	Alcanivoracaceae
		Clostridiales Family XI. Incertae Sedis	Desulfohalobiaceae	Bifidobacteriaceae	Alcanivoracaceae	Oscillatoriophycideae	Prochlorococcaceae	Thermoactinomycetaceae	Prevotellaceae		Coriobacteriaceae	Porphyromonadaceae
		Aerococcaceae	unclassified Acidobacteria	Veillonellaceae	Veillonellaceae	Thermoanaerobacteraceae		Rikenellaceae	Mycoplasmataceae		Oscillatoriophycideae	Desulfohalobiaceae
			Prochlorococcaceae	Fusobacteriaceae	Gordoniaceae	unclassified Acidobacteria		Oceanospirillaceae	Fusobacteriaceae		Streptococcaceae
				Paenibacillaceae	Coriobacteriaceae	Spirochaetaceae		Veillonellaceae	Desulfohalobiaceae		Helicobacteraceae
				Rikenellaceae	Acetobacteraceae	Alicyclobacillaceae			Bacillaceae		Peptococcaceae
				Prochlorococcaceae	Bacteroidaceae	Gordoniaceae			Alicyclobacillaceae
					Flavobacteriaceae	Desulfohalobiaceae
					Peptococcaceae	Clostridiales Family XVII
					unclassified Acidobacteria
ABC transposters	Clostridiaceae	Lachnospiraceae	Lachnospiraceae	Ruminococcaceae	Ruminococcaceae	Ruminococcaceae	Ruminococcaceae	Clostridiaceae	Lachnospiraceae	Lachnospiraceae	Lachnospiraceae	Ruminococcaceae
	Lachnospiraceae	Ruminococcaceae	Ruminococcaceae	Lachnospiraceae	Clostridiaceae	Lachnospiraceae	Lachnospiraceae	Ruminococcaceae	Ruminococcaceae	Ruminococcaceae	Ruminococcaceae	Lachnospiraceae
	Ruminococcaceae	Lactobacillaceae	Clostridiaceae	Clostridiaceae	Lachnospiraceae	Clostridiaceae	Lactobacillaceae	Clostridiales	Clostridiaceae	Clostridiaceae	Clostridiaceae	Clostridiales
	Clostridiales	Clostridiaceae	Clostridiales	Clostridiales	Clostridiales	Clostridiales	Clostridiaceae	Lachnospiraceae	Clostridiales	Clostridiales	Clostridiales	Helicobacteraceae
	Eubacteriaceae	Clostridiales	Eubacteriaceae	Helicobacteraceae	Eubacteriaceae	Eubacteriaceae	Clostridiales	Lactobacillaceae	Helicobacteraceae	Eubacteriaceae	Eubacteriaceae	Clostridiaceae
	Enterobacteriaceae	Eubacteriaceae	Thermoanaerobacterales Family III	Eubacteriaceae	Lactobacillaceae	Erysipelotrichaceae	Eubacteriaceae	Helicobacteraceae	Firmicutes	Peptostreptococcaceae	Firmicutes	Oscillospiraceae
	Thermoanaerobacterales Family III	Enterobacteriaceae	Streptosporangiaceae	Peptostreptococcaceae	Rhizobiaceae	Rhizobiaceae	Rhizobiaceae	Rhizobiaceae	Rhizobiaceae	Paenibacillaceae	Helicobacteraceae	Rhizobiaceae
	Firmicutes	Helicobacteraceae	Pasteurellaceae	Paenibacillaceae	Erysipelotrichaceae	Bifidobacteriaceae	Veillonellaceae	Thermoanaerobacterales Family III	Eubacteriaceae	Helicobacteraceae	Streptosporangiaceae	Pasteurellaceae
	Chloroflexi	Veillonellaceae	Lactobacillaceae	unclassified Clostridiales	Thermotogaceae	Pasteurellaceae	Helicobacteraceae	Oscillospiraceae	Thermoanaerobacterales Family III	Pasteurellaceae	Pasteurellaceae	Thermoanaerobacterales Family III
	Brachyspiraceae	Paenibacillaceae	Clostridiales Family XI. Incertae Sedis	Enterobacteriaceae	Streptococcaceae	unclassified Clostridiales	Thermoanaerobacterales Family III	Pasteurellaceae	Paenibacillaceae	Firmicutes	Synergistaceae	Eubacteriaceae
	Clostridiales Family XI	Brachyspiraceae	Brachyspiraceae	Lactobacillaceae	Pasteurellaceae		unclassified Clostridiales		unclassified Clostridiales	unclassified Clostridiales	Coriobacteriaceae	Roseiflexaceae
	Bacillaceae	Clostridiales Family XI. Incertae Sedis	Firmicutes	Rhizobiaceae	Oscillospiraceae		Pasteurellaceae		Pasteurellaceae	Aerococcaceae	unclassified Clostridiales	Paenibacillaceae
	Aerococcaceae	Bacillaceae	Enterobacteriaceae	Thermoanaerobacterales Family III	Helicobacteraceae		Paenibacillaceae		Streptosporangiaceae		Oscillospiraceae	Firmicutes
	Helicobacteraceae	Chloroflexi		Pasteurellaceae	Streptomycetaceae		Enterobacteriaceae		Peptostreptococcaceae		Aerococcaceae
	Rhizobiaceae	Peptostreptococcaceae		Spirochaetaceae	Carnobacteriaceae		Brachyspiraceae		Clostridiales Family XI		Bifidobacteriaceae
	unclassified Clostridiales	Streptomycetaceae		Methylocystaceae	Clostridiales Family XI		Clostridiales Family XI
	Lactobacillaceae	unclassified Clostridiales		Streptosporangiaceae			Peptostreptococcaceae
				Streptomycetaceae
				Clostridiales Family XI
				Erysipelotrichaceae
